# Supplementary material for: Multi-scale account of the network structure of macaque visual cortex
Source: PubMed Central journal article supplement (PMC5869897; doi:10.1007/s00429-017-1554-4), 2017-11-16
Supplement: 429_2017_1554_MOESM1_ESM.pdf [file 429_2017_1554_MOESM1_ESM.pdf]

## Supplemental material to “Multi-scale account of the network structure of macaque visual cortex”

Maximilian Schmidt · Rembrandt Bakker · Claus C. Hilgetag · Markus Diesmann · Sacha J. van Albada

the date of receipt and acceptance should be inserted later

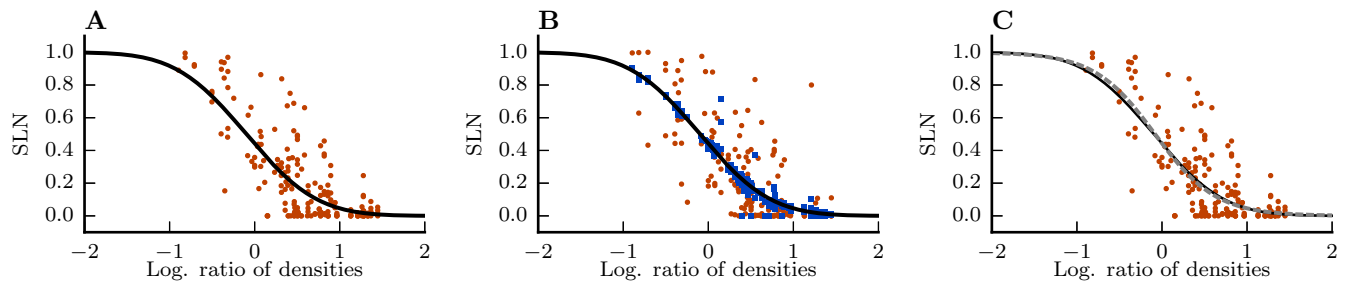

Figure S1: Related to Fig. 5. **Control for fit of a beta-binomial function.** Black curve in all panels, fit using a beta-binomial model with probit sigmoidal function (eq (7) in manuscript) ( $a_0 = -0.152$ ,  $a_1 = -1.534$ ,  $\phi = 0.214$ ). (A): Red dots, real data from Markov et al (2014b). (B): Red dots, random data generated from a beta-binomial distribution with fitted parameters  $a_0 = -0.152$ ,  $a_1 = -1.534$ ,  $\phi = 0.214$ . Blue boxes, random data generated from a beta-binomial distribution with parameters  $a_0 = -0.152$ ,  $a_1 = -1.534$ ,  $\phi = 0.001$ . (C): Red dots, real data from Markov et al (2014b). Gray dashed curve, fit using a beta-binomial model with logit sigmoidal function.

M. Schmidt

Institute of Neuroscience and Medicine (INM-6) and Institute for Advanced Simulation (IAS-6) and JARA Institute Brain Structure-Function Relationships (JBI-1 /INM-10), Jülich Research Centre, Jülich, Germany  
phone: +49-2461-61-4748. fax: +49-2461-61-9460  
E-mail: maximilian.schmidt@riken.jp

R. Bakker

Institute of Neuroscience and Medicine (INM-6) and Institute for Advanced Simulation (IAS-6) and JARA Institute Brain Structure-Function Relationships (JBI-1 /INM-10), Jülich Research Centre, Jülich, Germany,  
Donders Institute for Brain, Cognition and Behavior, Radboud University Nijmegen, Netherlands

C.-C. Hilgetag

Department of Computational Neuroscience, University Medical Center Eppendorf, Hamburg, Germany,  
Department of Health Sciences, Boston University, USA

M. Diesmann

Institute of Neuroscience and Medicine (INM-6) and Institute for Advanced Simulation (IAS-6) and JARA Institute Brain Structure-Function Relationships (JBI-1 /INM-10), Jülich Research Centre, Jülich, Germany  
Department of Psychiatry, Psychotherapy and Psychosomatics, Medical Faculty, RWTH Aachen University, Aachen, Germany,  
Department of Physics, Faculty 1, RWTH Aachen University, Aachen, Germany

S. J. van Albada

Institute of Neuroscience and Medicine (INM-6) and Institute for Advanced Simulation (IAS-6) and JARA Institute Brain Structure-Function Relationships (JBI-1 /INM-10), Jülich Research Centre, Jülich, Germany

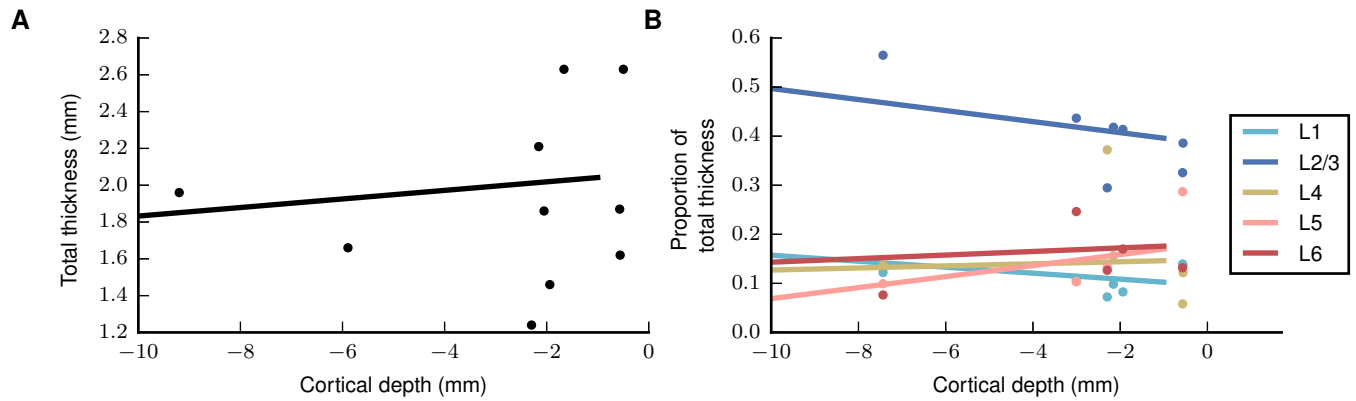

Figure S2: Related to Fig. 2. **Thickness versus cortical depth.** (A) Total thickness vs. cortical depth and linear least-squares fit showing no significant correlation ( $r = 0.12$ ,  $p = 0.68$ ). (B) Relative laminar thicknesses vs. cortical depth and linear least-squares fits also showing no significant correlation (L1:  $r = -0.43$ ,  $p = 0.14$ , L2/3:  $r = -0.46$ ,  $p = 0.11$ , L4:  $r = 0.08$ ,  $p = 0.79$ ; L5:  $r = -0.53$ ,  $p = 0.09$ , L6:  $r = 0.14$ ,  $p = 0.69$ ). The thickness data is the same as in Fig. 4. Cortical depth data obtained from F99 surface statistics available through the Caret Software (Van Essen, 2012). Values for each area are averaged across cortical surface and both hemispheres. The data is obtained using the F99 Sulcal depth tool on <http://cocomac.g-node.org> and can be directly accessed via these two links: [http://cocomac.g-node.org/cocomac2/services/f99\\_sulcal\\_depth.php?atlas=FW91&shape=Depth-Right&mode=avg&output=tsv&run=1](http://cocomac.g-node.org/cocomac2/services/f99_sulcal_depth.php?atlas=FW91&shape=Depth-Right&mode=avg&output=tsv&run=1) and [http://cocomac.g-node.org/cocomac2/services/f99\\_sulcal\\_depth.php?atlas=FW91&shape=Depth-Left&mode=avg&output=tsv&run=1](http://cocomac.g-node.org/cocomac2/services/f99_sulcal_depth.php?atlas=FW91&shape=Depth-Left&mode=avg&output=tsv&run=1).

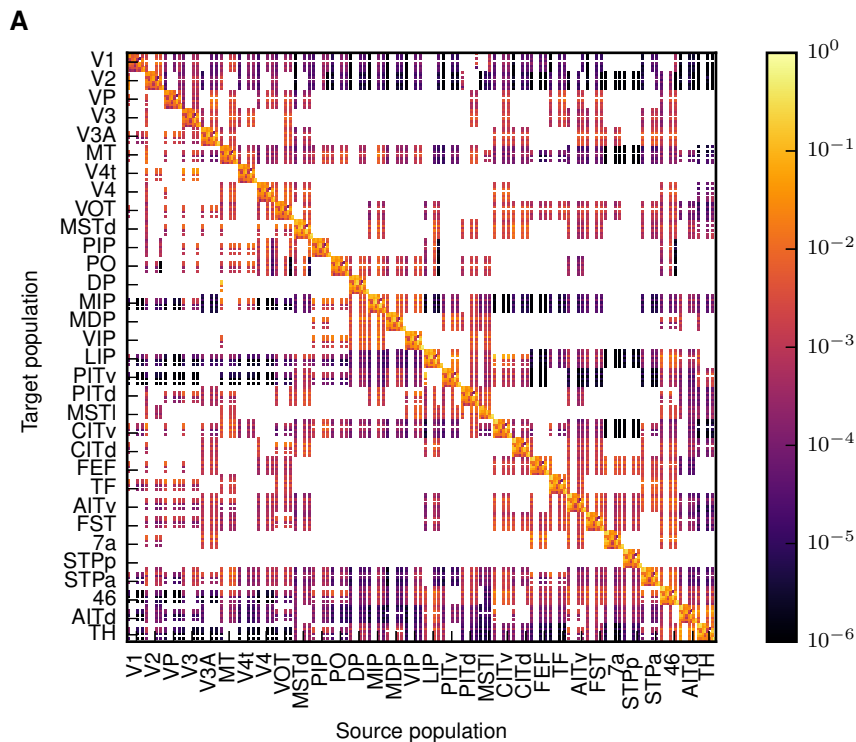

Figure S3: Related to Fig. 4. **Connection probabilities of the model** encoded in color. Areas are ordered according to their architectural types, and populations inside the areas are ordered as [2/3E, 2/3I, 4E/, 4I, 5E, 5I, 6E, 6I].

## Cortical areas in the model

| Lobe      | Abbreviation | Brain Region                              |                            |
|-----------|--------------|-------------------------------------------|----------------------------|
| Occipital | V1           | Visual area 1                             |                            |
|           | V2           | Visual area 2                             |                            |
|           | V3           | Visual area 3                             |                            |
|           | VP           | Ventral posterior                         |                            |
|           | V3A          | Visual area V3A                           |                            |
|           | V4           | Visual area 4                             |                            |
|           | VOT          | Ventral occipitotemporal                  |                            |
|           | V4t          | V4 transitional                           |                            |
|           | Temporal     | MT                                        | Middle temporal            |
|           |              | FST                                       | Floor of superior temporal |
| PITd      |              | Posterior inferotemporal (dorsal)         |                            |
| PITv      |              | Posterior inferotemporal (ventral)        |                            |
| CITd      |              | Central inferotemporal (dorsal)           |                            |
| CITv      |              | Central inferotemporal (ventral)          |                            |
| AITd      |              | Anterior inferotemporal (dorsal)          |                            |
| AITv      |              | Anterior inferotemporal (ventral)         |                            |
| STPp      |              | Superior temporal polysensory (posterior) |                            |
| STPa      |              | Superior temporal polysensory (anterior)  |                            |
| TF        |              | Parahippocampal area TF                   |                            |
| TH        |              | Parahippocampal area TH                   |                            |
| Parietal  | MSTd         | Medial superior temporal (dorsal)         |                            |
|           | MSTl         | Medial superior temporal (lateral)        |                            |
|           | PO           | Parieto-occipital                         |                            |
|           | PIP          | Posterior intraparietal                   |                            |
|           | LIP          | Lateral intraparietal                     |                            |
|           | VIP          | Ventral intraparietal                     |                            |
|           | MIP          | Medial intraparietal                      |                            |
|           | MDP          | Medial dorsal parietal                    |                            |
|           | DP           | Dorsal prelunate                          |                            |
|           | 7a           | 7a                                        |                            |
| Frontal   | FEF          | Frontal eye field                         |                            |
|           | 46           | Middle frontal area 46                    |                            |

Table S1: List of areas in the model. All vision-related areas of macaque cortex in the parcellation of Felleman and Van Essen (1991).

## Neuron densities

Layer-resolved neuronal volume densities for 14 areas are provided by H. Barbas (personal communication). For 3 of these areas, NeuN staining was used, and we linearly scale up the corresponding values to correct for undersampling with respect to Nissl staining as determined by repeat measurements of 11 areas. The original neuron densities resulting from NeuN staining are given in Hilgetag et al (2016a) Table 4.

## Translation of Table 4 of Hilgetag et al (2016a)

| Area in Hilgetag et al (2016a) | FV91 area              | Area in Hilgetag et al (2016a) | FV91 area       |
|--------------------------------|------------------------|--------------------------------|-----------------|
| V1                             | V1                     | MST                            | MSTd, MSTl      |
| V2                             | V2                     | PIP                            | PIP             |
| V3                             | V3                     | PIT                            | PITd, PITv      |
| VP                             | VP                     | PO                             | PO              |
| MT                             | MT                     | TF                             | TF              |
| V3A                            | V3A                    | VIP                            | VIP             |
| V4                             | V4                     | A46v                           | 46              |
| V4t                            | V4t                    | A7a                            | 7a              |
| VOT                            | VOT                    | AIT                            | AITd, AITv      |
| CIT                            | CITd, CITv             | FST                            | FST             |
| DP                             | DP                     | STP                            | STPa, STPp      |
| FEF                            | FEF                    | TH                             | TH              |
| LIPd, LIPv                     | LIP                    | TEO*                           | PITd, PITv, VOT |
| TEr*                           | AITd, AITv, CITd, CITv |                                |                 |

Table S2: Scheme for translating architectural types, overall neuron densities and cortical thicknesses given in Table 4 of Hilgetag et al (2016a) to the modeled areas in the parcellation scheme of Felleman and Van Essen (1991). Entries marked with a star are used to translate the overall neuron density and cortical thickness which are not available in the finer of the two parcellations used by Hilgetag et al (2016a).

## Relative laminar thicknesses from experimental literature

| Area | 1    | 2/3  | 4    | 5    | 6    | Source                          |
|------|------|------|------|------|------|---------------------------------|
| V1   | 0.08 | 0.25 | 0.37 | 0.14 | 0.16 | O’Kusky and Colonnier (1982)    |
| V1   | 0.09 | 0.29 | 0.39 | 0.11 | 0.12 | Rakic et al (1991)              |
| V1   | 0.08 | 0.32 | 0.38 | 0.14 | 0.08 | Felleman et al (1997)           |
| V1   | 0.05 | 0.31 | 0.36 | 0.14 | 0.14 | Eggan and Lewis (2007)          |
| V2   | 0.07 | 0.41 | 0.14 | 0.21 | 0.18 | Markov et al (2014a)            |
| V2   | 0.1  | 0.42 | 0.19 | 0.13 | 0.16 | Rakic et al (1991)              |
| V3   | 0.09 | 0.58 | 0.12 | 0.1  | 0.12 | Markov et al (2014a)            |
| V3   | 0.2  | 0.29 | 0.27 | -    | -    | Angelucci et al (2002)          |
| MT   | 0.11 | 0.54 | 0.13 | 0.11 | 0.11 | Markov et al (2014a)            |
| MT   | 0.09 | 0.43 | 0.14 | 0.16 | 0.18 | Preuss and Goldman-Rakic (1991) |
| V4   | 0.09 | 0.53 | 0.12 | 0.12 | 0.12 | Rockland (1992)                 |
| MIP  | 0.09 | 0.41 | 0.08 | 0.08 | 0.34 | Rozzi et al (2006)              |
| VIP  | 0.12 | 0.56 | 0.14 | 0.1  | 0.08 | Preuss and Goldman-Rakic (1991) |
| LIP  | 0.09 | 0.36 | 0.09 | 0.08 | 0.39 | Rozzi et al (2006)              |
| LIP  | 0.13 | 0.52 | 0.12 | 0.13 | 0.1  | Preuss and Goldman-Rakic (1991) |
| FEF  | 0.1  | 0.42 | 0.16 | 0.17 | 0.16 | Boussaoud et al (1990)          |
| TF   | 0.14 | 0.39 | 0.12 | -    | -    | Preuss and Goldman-Rakic (1991) |
| FST  | 0.24 | 0.42 | 0.08 | -    | -    | Lavenex et al (2002)            |
| 46   | 0.1  | 0.45 | 0.1  | 0.15 | 0.2  | Eggan and Lewis (2007)          |
| 46   | 0.13 | 0.43 | 0.09 | -    | -    | Petrides and Pandya (1999)      |
| TH   | -    | -    | 0.0  | -    | -    | Suzuki and Amaral (2003)        |
| TH   | 0.14 | 0.33 | 0.12 | 0.29 | 0.13 | Preuss and Goldman-Rakic (1991) |

Table S3: Relative laminar thicknesses determined from the anatomical studies given in the last column.

## Mapping of injection sites to FV91 parcellation

| Monkey  | M132 area | FV91 area | Monkey  | M132 area | FV91 area |
|---------|-----------|-----------|---------|-----------|-----------|
| M88RH   | V1        | V1        | M101LH  | V2        | V2        |
| M121LH  | V1        | V1        | M101RH  | V2        | V2        |
| M81LH   | V1        | V1        | M103LH  | V2        | V2        |
| M85LH   | V1        | V1        | M123LH  | V4        | V4        |
| M85RH   | V1        | V1        | M121RH  | V4        | V4        |
| BB289RH | STPr      | STPa      | M119LH  | TEO       | V4        |
| BB289LH | STPi      | STPp      | BB135LH | 7A        | 7a        |
| M90RH   | STPc      | STPp      | M89LH   | DP        | DP        |
| M106LH  | 9/46d     | FEF       | BB272RH | 8l        | FEF       |
| M133LH  | MT        | MSTd      | M116LH  | 46d       | 46        |
| M116RH  | 9/46v     | 46        | BB272LH | 8m        | FEF       |
| M128RH  | TEPd      | CITv      | M108LH  | PBr       | STPp      |

Table S4: Injected areas of the data set of Markov et al (2014a) in the M132 parcellation and corresponding areas in the FV91 scheme. Only the injections in vision-related cortex are shown.

## Inter-areal distances

| Area | V1   | V2   | VP   | V3   | V3A  | MT   | V4t  | V4   | VOT  | MSTd | PIP  | PO   | DP   | MIP  | MDP  | VIP  |
|------|------|------|------|------|------|------|------|------|------|------|------|------|------|------|------|------|
| V1   | 0.0  | 17.9 | 19.9 | 14.6 | 16.8 | 22.5 | 23.1 | 22.9 | 29.0 | 26.8 | 18.8 | 21.5 | 23.7 | 24.5 | 29.2 | 26.3 |
| V2   | 17.9 | 0.0  | 16.1 | 17.8 | 18.2 | 20.0 | 20.5 | 21.2 | 24.5 | 24.4 | 19.8 | 23.8 | 24.6 | 26.0 | 30.8 | 25.8 |
| VP   | 19.9 | 16.1 | 0.0  | 20.8 | 19.0 | 14.9 | 15.1 | 14.6 | 12.8 | 20.9 | 20.1 | 25.2 | 25.4 | 26.9 | 31.9 | 25.5 |
| V3   | 14.6 | 17.8 | 20.8 | 0.0  | 8.1  | 15.9 | 17.0 | 18.5 | 26.9 | 19.4 | 10.6 | 14.6 | 15.1 | 16.9 | 22.0 | 18.1 |
| V3A  | 16.8 | 18.2 | 19.0 | 8.1  | 0.0  | 12.4 | 13.4 | 15.6 | 23.4 | 15.4 | 9.2  | 15.0 | 9.4  | 16.3 | 21.2 | 13.8 |
| MT   | 22.5 | 20.0 | 14.9 | 15.9 | 12.4 | 0.0  | 6.0  | 11.4 | 13.7 | 10.0 | 13.2 | 19.1 | 16.6 | 20.0 | 23.9 | 13.7 |
| V4t  | 23.1 | 20.5 | 15.1 | 17.0 | 13.4 | 6.0  | 0.0  | 9.9  | 12.1 | 12.1 | 15.2 | 21.3 | 17.8 | 22.1 | 26.3 | 16.4 |
| V4   | 22.9 | 21.2 | 14.6 | 18.5 | 15.6 | 11.4 | 9.9  | 0.0  | 13.1 | 17.8 | 18.6 | 24.6 | 20.4 | 25.6 | 30.5 | 21.4 |
| VOT  | 29.0 | 24.5 | 12.8 | 26.9 | 23.4 | 13.7 | 12.1 | 13.1 | 0.0  | 19.7 | 24.6 | 30.0 | 28.5 | 31.0 | 36.0 | 26.6 |
| MSTd | 26.8 | 24.4 | 20.9 | 19.4 | 15.4 | 10.0 | 12.1 | 17.8 | 19.7 | 0.0  | 14.5 | 20.6 | 17.1 | 20.2 | 24.1 | 11.5 |
| PIP  | 18.8 | 19.8 | 20.1 | 10.6 | 9.2  | 13.2 | 15.2 | 18.6 | 24.6 | 14.5 | 0.0  | 9.5  | 12.3 | 9.8  | 14.2 | 11.2 |
| PO   | 21.5 | 23.8 | 25.2 | 14.6 | 15.0 | 19.1 | 21.3 | 24.6 | 30.0 | 20.6 | 9.5  | 0.0  | 18.9 | 6.9  | 10.0 | 16.0 |
| DP   | 23.7 | 24.6 | 25.4 | 15.1 | 9.4  | 16.6 | 17.8 | 20.4 | 28.5 | 17.1 | 12.3 | 18.9 | 0.0  | 18.3 | 22.0 | 11.1 |
| MIP  | 24.5 | 26.0 | 26.9 | 16.9 | 16.3 | 20.0 | 22.1 | 25.6 | 31.0 | 20.2 | 9.8  | 6.9  | 18.3 | 0.0  | 6.3  | 14.6 |
| MDP  | 29.2 | 30.8 | 31.9 | 22.0 | 21.2 | 23.9 | 26.3 | 30.5 | 36.0 | 24.1 | 14.2 | 10.0 | 22.0 | 6.3  | 0.0  | 17.4 |
| VIP  | 26.3 | 25.8 | 25.5 | 18.1 | 13.8 | 13.7 | 16.4 | 21.4 | 26.6 | 11.5 | 11.2 | 16.0 | 11.1 | 14.6 | 17.4 | 0.0  |
| LIP  | 27.8 | 27.6 | 28.0 | 19.3 | 14.6 | 16.0 | 18.6 | 23.3 | 29.1 | 12.4 | 13.6 | 19.5 | 10.1 | 18.2 | 21.1 | 7.4  |
| PITv | 32.9 | 28.0 | 16.8 | 30.4 | 26.8 | 16.3 | 14.8 | 16.3 | 7.4  | 21.5 | 27.6 | 32.9 | 31.9 | 34.0 | 38.7 | 28.8 |
| PITd | 31.6 | 27.3 | 17.8 | 27.4 | 23.5 | 13.1 | 11.6 | 14.1 | 8.6  | 18.7 | 24.8 | 30.6 | 28.2 | 31.4 | 35.9 | 25.7 |
| MSTl | 28.4 | 24.4 | 17.4 | 22.6 | 18.9 | 8.2  | 9.9  | 15.7 | 13.2 | 9.1  | 18.0 | 24.0 | 22.7 | 24.2 | 28.3 | 16.9 |
| CITv | 38.8 | 33.4 | 22.4 | 36.0 | 32.7 | 21.6 | 21.1 | 22.5 | 12.9 | 25.7 | 32.4 | 37.6 | 37.7 | 38.8 | 43.1 | 33.1 |
| CITd | 37.7 | 32.5 | 22.0 | 34.3 | 31.0 | 19.5 | 19.2 | 20.9 | 12.2 | 23.2 | 30.5 | 35.9 | 35.7 | 37.0 | 41.0 | 30.7 |
| FEF  | 57.1 | 53.9 | 48.3 | 50.0 | 45.8 | 37.9 | 40.3 | 45.8 | 42.1 | 36.4 | 42.9 | 47.9 | 46.2 | 45.4 | 46.7 | 36.8 |
| TF   | 29.6 | 24.8 | 16.3 | 27.4 | 24.7 | 15.8 | 17.1 | 20.1 | 14.4 | 20.2 | 23.5 | 28.0 | 29.8 | 29.5 | 33.7 | 25.9 |
| AITv | 43.8 | 38.2 | 28.2 | 41.1 | 38.1 | 26.6 | 27.0 | 28.9 | 19.5 | 30.1 | 36.7 | 41.4 | 42.7 | 42.5 | 46.7 | 36.5 |
| FST  | 33.7 | 28.9 | 20.3 | 28.8 | 25.6 | 14.2 | 15.7 | 19.2 | 12.8 | 16.5 | 24.6 | 29.8 | 29.6 | 30.6 | 34.2 | 23.8 |
| 7a   | 28.2 | 27.6 | 27.4 | 19.9 | 14.5 | 15.5 | 18.0 | 22.4 | 27.8 | 11.0 | 14.5 | 20.9 | 11.5 | 20.0 | 23.2 | 9.4  |
| STPp | 38.0 | 34.3 | 27.7 | 31.7 | 28.1 | 18.1 | 20.0 | 25.5 | 22.5 | 16.0 | 27.2 | 32.9 | 30.8 | 33.0 | 36.6 | 24.3 |
| STPa | 44.3 | 39.2 | 30.2 | 40.2 | 37.1 | 25.5 | 27.0 | 30.0 | 21.8 | 27.3 | 35.3 | 40.4 | 40.9 | 41.0 | 44.5 | 33.6 |
| 46   | 62.9 | 59.5 | 54.1 | 55.9 | 51.8 | 43.9 | 46.4 | 51.5 | 47.7 | 42.4 | 49.0 | 53.3 | 52.0 | 50.8 | 52.0 | 42.6 |
| AITd | 46.3 | 40.9 | 31.2 | 43.3 | 40.4 | 28.4 | 29.0 | 30.3 | 21.6 | 31.6 | 39.0 | 43.9 | 44.7 | 44.7 | 48.9 | 38.1 |
| TH   | 30.8 | 26.3 | 19.9 | 27.5 | 25.1 | 17.1 | 18.9 | 22.6 | 18.1 | 20.6 | 22.4 | 26.2 | 29.4 | 28.2 | 31.4 | 24.9 |

  

| Area | LIP  | PITv | PITd | MSTl | CITv | CITd | FEF  | TF   | AITv | FST  | 7a   | STPp | STPa | 46   | AITd | TH   |
|------|------|------|------|------|------|------|------|------|------|------|------|------|------|------|------|------|
| V1   | 27.8 | 32.9 | 31.6 | 28.4 | 38.8 | 37.7 | 57.1 | 29.6 | 43.8 | 33.7 | 28.2 | 38.0 | 44.3 | 62.9 | 46.3 | 30.8 |
| V2   | 27.6 | 28.0 | 27.3 | 24.4 | 33.4 | 32.5 | 53.9 | 24.8 | 38.2 | 28.9 | 27.6 | 34.3 | 39.2 | 59.5 | 40.9 | 26.3 |
| VP   | 28.0 | 16.8 | 17.8 | 17.4 | 22.4 | 22.0 | 48.3 | 16.3 | 28.2 | 20.3 | 27.4 | 27.7 | 30.2 | 54.1 | 31.2 | 19.9 |
| V3   | 19.3 | 30.4 | 27.4 | 22.6 | 36.0 | 34.3 | 50.0 | 27.4 | 41.1 | 28.8 | 19.9 | 31.7 | 40.2 | 55.9 | 43.3 | 27.5 |
| V3A  | 14.6 | 26.8 | 23.5 | 18.9 | 32.7 | 31.0 | 45.8 | 24.7 | 38.1 | 25.6 | 14.5 | 28.1 | 37.1 | 51.8 | 40.4 | 25.1 |
| MT   | 16.0 | 16.3 | 13.1 | 8.2  | 21.6 | 19.5 | 37.9 | 15.8 | 26.6 | 14.2 | 15.5 | 18.1 | 25.5 | 43.9 | 28.4 | 17.1 |
| V4t  | 18.6 | 14.8 | 11.6 | 9.9  | 21.1 | 19.2 | 40.3 | 17.1 | 27.0 | 15.7 | 18.0 | 20.0 | 27.0 | 46.4 | 29.0 | 18.9 |
| V4   | 23.3 | 16.3 | 14.1 | 15.7 | 22.5 | 20.9 | 45.8 | 20.1 | 28.9 | 19.2 | 22.4 | 25.5 | 30.0 | 51.5 | 30.3 | 22.6 |
| VOT  | 29.1 | 7.4  | 8.6  | 13.2 | 12.9 | 12.2 | 42.1 | 14.4 | 19.5 | 12.8 | 27.8 | 22.5 | 21.8 | 47.7 | 21.6 | 18.1 |
| MSTd | 12.4 | 21.5 | 18.7 | 9.1  | 25.7 | 23.2 | 36.4 | 20.2 | 30.1 | 16.5 | 11.0 | 16.0 | 27.3 | 42.4 | 31.6 | 20.6 |
| PIP  | 13.6 | 27.6 | 24.8 | 18.0 | 32.4 | 30.5 | 42.9 | 23.5 | 36.7 | 24.6 | 14.5 | 27.2 | 35.3 | 49.0 | 39.0 | 22.4 |
| PO   | 19.5 | 32.9 | 30.6 | 24.0 | 37.6 | 35.9 | 47.9 | 28.0 | 41.4 | 29.8 | 20.9 | 32.9 | 40.4 | 53.3 | 43.9 | 26.2 |
| DP   | 10.1 | 31.9 | 28.2 | 22.7 | 37.7 | 35.7 | 46.2 | 29.8 | 42.7 | 29.6 | 11.5 | 30.8 | 40.9 | 52.0 | 44.7 | 29.4 |
| MIP  | 18.2 | 34.0 | 31.4 | 24.2 | 38.8 | 37.0 | 45.4 | 29.5 | 42.5 | 30.6 | 20.0 | 33.0 | 41.0 | 50.8 | 44.7 | 28.2 |
| MDP  | 21.1 | 38.7 | 35.9 | 28.3 | 43.1 | 41.0 | 46.7 | 33.7 | 46.7 | 34.2 | 23.2 | 36.6 | 44.5 | 52.0 | 48.9 | 31.4 |
| VIP  | 7.4  | 28.8 | 25.7 | 16.9 | 33.1 | 30.7 | 36.8 | 25.9 | 36.5 | 23.8 | 9.4  | 24.3 | 33.6 | 42.6 | 38.1 | 24.9 |
| LIP  | 0.0  | 31.2 | 28.0 | 18.7 | 35.5 | 33.1 | 39.0 | 28.9 | 39.5 | 26.2 | 7.1  | 25.5 | 36.2 | 45.1 | 40.9 | 28.2 |
| PITv | 31.2 | 0.0  | 8.3  | 13.9 | 9.3  | 8.3  | 40.5 | 14.1 | 15.4 | 11.2 | 29.7 | 21.6 | 18.4 | 45.8 | 17.2 | 18.1 |
| PITd | 28.0 | 8.3  | 0.0  | 12.1 | 12.7 | 10.4 | 39.9 | 15.8 | 19.1 | 10.9 | 26.5 | 20.2 | 20.2 | 45.4 | 19.7 | 19.2 |
| MSTl | 18.7 | 13.9 | 12.1 | 0.0  | 17.7 | 15.1 | 32.4 | 14.3 | 22.2 | 8.8  | 17.2 | 11.9 | 19.8 | 38.4 | 23.9 | 15.8 |
| CITv | 35.5 | 9.3  | 12.7 | 17.7 | 0.0  | 6.4  | 38.7 | 14.6 | 9.3  | 11.8 | 33.9 | 20.9 | 13.8 | 43.2 | 10.9 | 18.3 |
| CITd | 33.1 | 8.3  | 10.4 | 15.1 | 6.4  | 0.0  | 36.5 | 13.9 | 10.3 | 9.0  | 31.4 | 18.5 | 12.4 | 41.2 | 10.7 | 17.2 |
| FEF  | 39.0 | 40.5 | 39.9 | 32.4 | 38.7 | 36.5 | 0.0  | 39.9 | 36.5 | 30.5 | 39.4 | 33.3 | 29.3 | 11.2 | 35.2 | 39.8 |
| TF   | 28.9 | 14.1 | 15.8 | 14.3 | 14.6 | 13.9 | 39.9 | 0.0  | 16.4 | 12.7 | 27.9 | 21.7 | 19.0 | 44.7 | 19.6 | 9.7  |
| AITv | 39.5 | 15.4 | 19.1 | 22.2 | 9.3  | 10.3 | 36.5 | 16.4 | 0.0  | 14.3 | 38.3 | 21.7 | 10.7 | 39.9 | 7.4  | 18.5 |
| FST  | 26.2 | 11.2 | 10.9 | 8.8  | 11.8 | 9.0  | 30.5 | 12.7 | 14.3 | 0.0  | 24.7 | 12.4 | 12.2 | 36.0 | 15.5 | 14.6 |
| 7a   | 7.1  | 29.7 | 26.5 | 17.2 | 33.9 | 31.4 | 39.4 | 27.9 | 38.3 | 24.7 | 0.0  | 23.6 | 35.3 | 45.4 | 40.0 | 27.6 |
| STPp | 25.5 | 21.6 | 20.2 | 11.9 | 20.9 | 18.5 | 33.3 | 21.7 | 21.7 | 12.4 | 23.6 | 0.0  | 16.0 | 38.4 | 22.2 | 23.3 |
| STPa | 36.2 | 18.4 | 20.2 | 19.8 | 13.8 | 12.4 | 29.3 | 19.0 | 10.7 | 12.2 | 35.3 | 16.0 | 0.0  | 33.1 | 10.2 | 20.7 |
| 46   | 45.1 | 45.8 | 45.4 | 38.4 | 43.2 | 41.2 | 11.2 | 44.7 | 39.9 | 36.0 | 45.4 | 38.4 | 33.1 | 0.0  | 38.3 | 44.6 |
| AITd | 40.9 | 17.2 | 19.7 | 23.9 | 10.9 | 10.7 | 35.2 | 19.6 | 7.4  | 15.5 | 40.0 | 22.2 | 10.2 | 38.3 | 0.0  | 21.8 |
| TH   | 28.2 | 18.1 | 19.2 | 15.8 | 18.3 | 17.2 | 39.8 | 9.7  | 18.5 | 14.6 | 27.6 | 23.3 | 20.7 | 44.6 | 21.8 | 0.0  |

Table S5: Distances (in mm) between the areas of the model computed as the median of the distances between all vertex pairs of the two areas in their surface representation in F99 space, a standard macaque cortical surface included with Caret (Van Essen et al, 2001), where the vertex-to-vertex distance is the length of the shortest possible path without crossing the cortical surface (Bojak et al, 2011).

## External input

| Area | 2/3E  |       | 2/3I   |       | 4E     |       | 4I     |       | 5E     |       | 5I    |       | 6E    |       | 6I    |       |
|------|-------|-------|--------|-------|--------|-------|--------|-------|--------|-------|-------|-------|-------|-------|-------|-------|
| V1   | 3,550 | 1,246 | 2,885  | 1,246 | 1,975  | 1,246 | 2,860  | 1,246 | 4,100  | 1,246 | 1,632 | 1,246 | 2,008 | 1,246 | 1,644 | 1,246 |
| V2   | 3,608 | 1,848 | 3,853  | 1,848 | 3,413  | 1,848 | 4,819  | 1,848 | 5,669  | 1,848 | 3,124 | 1,848 | 4,596 | 1,848 | 3,511 | 1,848 |
| VP   | 4,345 | 1,756 | 4,345  | 1,756 | 3,455  | 1,756 | 4,233  | 1,756 | 6,012  | 1,756 | 2,598 | 1,756 | 3,383 | 1,756 | 2,605 | 1,756 |
| V3   | 4,227 | 1,810 | 4,270  | 1,810 | 3,833  | 1,810 | 4,664  | 1,810 | 6,341  | 1,810 | 2,576 | 1,810 | 3,618 | 1,810 | 2,558 | 1,810 |
| V3A  | 6,086 | 2,703 | 6,347  | 2,703 | 7,114  | 2,703 | 8,001  | 2,703 | 7,881  | 2,703 | 3,714 | 2,703 | 4,786 | 2,703 | 3,587 | 2,703 |
| MT   | 5,530 | 2,510 | 5,685  | 2,510 | 6,383  | 2,510 | 6,841  | 2,510 | 7,557  | 2,510 | 3,372 | 2,510 | 4,537 | 2,510 | 3,326 | 2,510 |
| V4t  | 5,700 | 2,293 | 6,234  | 2,293 | 5,856  | 2,293 | 6,867  | 2,293 | 7,815  | 2,293 | 3,843 | 2,293 | 4,952 | 2,293 | 3,795 | 2,293 |
| V4   | 4,749 | 2,337 | 5,074  | 2,337 | 5,481  | 2,337 | 5,861  | 2,337 | 7,051  | 2,337 | 3,272 | 2,337 | 4,769 | 2,337 | 3,453 | 2,337 |
| VOT  | 5,065 | 2,409 | 5,346  | 2,409 | 7,426  | 2,409 | 9,952  | 2,409 | 5,375  | 2,409 | 2,786 | 2,409 | 3,713 | 2,409 | 2,462 | 2,409 |
| MSTd | 7,356 | 3,181 | 7,219  | 3,181 | 8,903  | 3,181 | 9,986  | 3,181 | 8,606  | 3,181 | 3,938 | 3,181 | 4,714 | 3,181 | 3,764 | 3,181 |
| PIP  | 6,913 | 3,327 | 7,216  | 3,327 | 8,900  | 3,327 | 10,165 | 3,327 | 8,286  | 3,327 | 4,069 | 3,327 | 4,971 | 3,327 | 3,859 | 3,327 |
| PO   | 7,482 | 3,226 | 7,432  | 3,226 | 8,083  | 3,226 | 8,943  | 3,226 | 9,001  | 3,226 | 4,167 | 3,226 | 4,879 | 3,226 | 4,033 | 3,226 |
| DP   | 7,751 | 3,328 | 7,793  | 3,328 | 9,097  | 3,328 | 9,133  | 3,328 | 9,596  | 3,328 | 4,477 | 3,328 | 5,249 | 3,328 | 4,385 | 3,328 |
| MIP  | 8,244 | 3,474 | 7,919  | 3,474 | 8,191  | 3,474 | 8,911  | 3,474 | 10,903 | 3,474 | 4,303 | 3,474 | 4,547 | 3,474 | 4,105 | 3,474 |
| MDP  | 6,349 | 5,186 | 6,702  | 5,186 | 3,587  | 5,186 | 7,457  | 5,186 | 6,246  | 5,186 | 3,493 | 5,186 | 3,271 | 5,186 | 3,086 | 5,186 |
| VIP  | 6,602 | 3,378 | 6,777  | 3,378 | 7,163  | 3,378 | 8,095  | 3,378 | 9,069  | 3,378 | 3,939 | 3,378 | 5,653 | 3,378 | 4,078 | 3,378 |
| LIP  | 7,331 | 3,311 | 7,438  | 3,311 | 8,690  | 3,311 | 8,926  | 3,311 | 9,781  | 3,311 | 4,362 | 3,311 | 4,623 | 3,311 | 3,910 | 3,311 |
| PITv | 6,108 | 2,441 | 5,906  | 2,441 | 5,602  | 2,441 | 7,010  | 2,441 | 7,243  | 2,441 | 3,231 | 2,441 | 3,892 | 2,441 | 3,136 | 2,441 |
| PITd | 5,820 | 2,471 | 5,721  | 2,471 | 6,000  | 2,471 | 7,663  | 2,471 | 6,760  | 2,471 | 3,105 | 2,471 | 3,818 | 2,471 | 2,957 | 2,471 |
| MSTl | 7,491 | 3,094 | 7,482  | 3,094 | 8,566  | 3,094 | 9,595  | 3,094 | 8,935  | 3,094 | 4,122 | 3,094 | 5,013 | 3,094 | 3,917 | 3,094 |
| CITv | 8,696 | 3,844 | 8,567  | 3,844 | 12,863 | 3,844 | 13,354 | 3,844 | 9,926  | 3,844 | 4,627 | 3,844 | 5,434 | 3,844 | 4,387 | 3,844 |
| CITd | 7,641 | 3,708 | 8,066  | 3,708 | 17,442 | 3,708 | 20,485 | 3,708 | 8,023  | 3,708 | 4,204 | 3,708 | 5,357 | 3,708 | 3,714 | 3,708 |
| FEF  | 7,499 | 3,597 | 7,936  | 3,597 | 9,253  | 3,597 | 9,708  | 3,597 | 8,286  | 3,597 | 4,003 | 3,597 | 4,634 | 3,597 | 3,802 | 3,597 |
| TF   | 7,497 | 3,805 | 7,692  | 3,805 | 8,692  | 3,805 | 10,184 | 3,805 | 8,790  | 3,805 | 4,268 | 3,805 | 5,135 | 3,805 | 4,027 | 3,805 |
| AITv | 8,947 | 3,786 | 8,716  | 3,786 | 12,235 | 3,786 | 12,248 | 3,786 | 10,346 | 3,786 | 4,735 | 3,786 | 5,498 | 3,786 | 4,539 | 3,786 |
| FST  | 9,905 | 4,614 | 10,189 | 4,614 | 14,721 | 4,614 | 15,183 | 4,614 | 11,516 | 4,614 | 5,671 | 4,614 | 6,641 | 4,614 | 5,428 | 4,614 |
| 7a   | 9,280 | 4,361 | 9,450  | 4,361 | 14,158 | 4,361 | 12,136 | 4,361 | 11,391 | 4,361 | 5,446 | 4,361 | 6,207 | 4,361 | 5,206 | 4,361 |
| STPp | 8,147 | 4,246 | 8,771  | 4,246 | 14,959 | 4,246 | 15,201 | 4,246 | 9,707  | 4,246 | 5,026 | 4,246 | 5,931 | 4,246 | 4,669 | 4,246 |
| STPa | 8,283 | 4,032 | 8,546  | 4,032 | 17,072 | 4,032 | 18,775 | 4,032 | 9,054  | 4,032 | 4,548 | 4,032 | 5,531 | 4,032 | 4,151 | 4,032 |
| 46   | 8,562 | 4,309 | 9,443  | 4,309 | 12,826 | 4,309 | 11,556 | 4,309 | 10,709 | 4,309 | 5,580 | 4,309 | 6,265 | 4,309 | 5,267 | 4,309 |
| AITd | 9,256 | 3,784 | 8,883  | 3,784 | 11,106 | 3,784 | 10,468 | 3,784 | 10,878 | 3,784 | 4,865 | 3,784 | 5,540 | 3,784 | 4,731 | 3,784 |
| TH   | 9,229 | 5,491 | 9,829  | 5,491 |        |       |        |       | 9,468  | 5,491 | 4,774 | 5,491 | 6,566 | 5,491 | 5,629 | 5,491 |

Table S6: Numbers of intrinsic (light gray column) and extrinsic (dark gray column) synapses per neuron for all areas of the model.

## Laminar thicknesses

| Area | 1    | 2/3  | 4    | 5    | 6    | Total |
|------|------|------|------|------|------|-------|
| V1   | 0.09 | 0.37 | 0.46 | 0.17 | 0.16 | 1.24  |
| V2   | 0.12 | 0.60 | 0.24 | 0.25 | 0.25 | 1.46  |
| VP   | 0.18 | 0.63 | 0.32 | 0.21 | 0.25 | 1.59  |
| V3   | 0.23 | 0.70 | 0.31 | 0.16 | 0.19 | 1.59  |
| V3A  | 0.20 | 0.71 | 0.24 | 0.23 | 0.28 | 1.66  |
| MT   | 0.20 | 0.95 | 0.26 | 0.26 | 0.29 | 1.96  |
| V4t  | 0.22 | 0.80 | 0.29 | 0.26 | 0.31 | 1.88  |
| V4   | 0.18 | 1.00 | 0.24 | 0.24 | 0.24 | 1.89  |
| VOT  | 0.23 | 0.81 | 0.28 | 0.27 | 0.32 | 1.90  |
| MSTd | 0.26 | 0.92 | 0.24 | 0.30 | 0.36 | 2.07  |
| PIP  | 0.26 | 0.92 | 0.24 | 0.30 | 0.36 | 2.07  |
| PO   | 0.26 | 0.92 | 0.24 | 0.30 | 0.36 | 2.07  |
| DP   | 0.26 | 0.91 | 0.23 | 0.30 | 0.36 | 2.06  |
| MIP  | 0.20 | 0.85 | 0.17 | 0.16 | 0.70 | 2.07  |
| MDP  | 0.26 | 0.92 | 0.24 | 0.30 | 0.36 | 2.07  |
| VIP  | 0.25 | 1.17 | 0.28 | 0.21 | 0.16 | 2.07  |
| LIP  | 0.25 | 1.00 | 0.24 | 0.24 | 0.57 | 2.30  |
| PITv | 0.23 | 0.81 | 0.28 | 0.27 | 0.32 | 1.90  |
| PITd | 0.23 | 0.81 | 0.28 | 0.27 | 0.32 | 1.90  |
| MSTl | 0.26 | 0.92 | 0.24 | 0.30 | 0.36 | 2.07  |
| CITv | 0.29 | 1.02 | 0.19 | 0.33 | 0.40 | 2.23  |
| CITd | 0.29 | 1.02 | 0.19 | 0.33 | 0.40 | 2.23  |
| FEF  | 0.22 | 0.92 | 0.35 | 0.37 | 0.35 | 2.21  |
| TF   | 0.23 | 0.66 | 0.21 | 0.24 | 0.28 | 1.62  |
| AITv | 0.34 | 1.20 | 0.23 | 0.39 | 0.47 | 2.63  |
| FST  | 0.51 | 0.90 | 0.18 | 0.30 | 0.36 | 2.25  |
| 7a   | 0.35 | 1.24 | 0.21 | 0.41 | 0.48 | 2.68  |
| STPp | 0.29 | 1.03 | 0.18 | 0.34 | 0.40 | 2.25  |
| STPa | 0.29 | 1.03 | 0.18 | 0.34 | 0.40 | 2.25  |
| 46   | 0.22 | 0.82 | 0.18 | 0.28 | 0.36 | 1.86  |
| AITd | 0.34 | 1.20 | 0.23 | 0.39 | 0.47 | 2.63  |
| TH   | 0.28 | 0.65 | 0.12 | 0.57 | 0.26 | 1.87  |

Table S7: Laminar thicknesses in mm for all 32 areas of the model. Values are rounded to two decimal places. These values are used to determine population sizes for the modeled layers 2/3, 4, 5 and 6 and to distribute synapses across layers 1 to 6 of target areas for cortico-cortical connections (cf. Results and Table S11).

## Area surfaces

| Area | Surface area (mm <sup>2</sup> ) | Area | Surface area (mm <sup>2</sup> ) | Area | Surface area (mm <sup>2</sup> ) |
|------|---------------------------------|------|---------------------------------|------|---------------------------------|
| V1   | 1484.63                         | V3   | 120.57                          | PO   | 75.37                           |
| V2   | 1193.40                         | CITv | 114.67                          | VOT  | 70.11                           |
| V4   | 561.41                          | DP   | 113.83                          | FST  | 61.33                           |
| STPp | 245.48                          | PIP  | 106.15                          | CITd | 57.54                           |
| TF   | 197.40                          | PITv | 100.34                          | LIP  | 56.04                           |
| 46   | 185.16                          | V3A  | 96.96                           | MT   | 55.90                           |
| FEF  | 161.54                          | AITv | 93.12                           | MIP  | 45.09                           |
| 7a   | 157.34                          | AITd | 91.59                           | TH   | 44.60                           |
| PITd | 145.38                          | VIP  | 85.06                           | MSTl | 29.19                           |
| VP   | 130.58                          | STPa | 78.72                           | V4t  | 28.23                           |
| MSTd | 120.57                          | MDP  | 77.49                           |      |                                 |

Table S8: Surface areas computed with Caret (Van Essen et al, 2001) on the basis of each area's representation on the F99 cortical surface (Van Essen, 2002). Areas are ordered from large to small.

## Population sizes

| Area | 2/3E   | 2/3I   | 4E     | 4I     | 5E     | 5I    | 6E     | 6I    | Total   |
|------|--------|--------|--------|--------|--------|-------|--------|-------|---------|
| V1   | 47,386 | 13,366 | 70,387 | 17,597 | 20,740 | 4,554 | 19,839 | 4,063 | 197,935 |
| V2   | 50,521 | 14,250 | 36,685 | 9,171  | 19,079 | 4,189 | 19,248 | 3,941 | 157,087 |
| VP   | 52,973 | 14,942 | 49,292 | 12,323 | 15,929 | 3,497 | 19,130 | 3,917 | 172,007 |
| V3   | 58,475 | 16,494 | 47,428 | 11,857 | 12,056 | 2,647 | 14,529 | 2,975 | 166,465 |
| V3A  | 40,887 | 11,532 | 23,789 | 5,947  | 12,671 | 2,782 | 15,218 | 3,116 | 115,946 |
| MT   | 60,606 | 17,095 | 28,202 | 7,050  | 14,176 | 3,113 | 15,837 | 3,243 | 149,324 |
| V4t  | 48,175 | 13,588 | 34,735 | 8,684  | 14,857 | 3,262 | 17,843 | 3,654 | 144,801 |
| V4   | 64,447 | 18,178 | 33,855 | 8,464  | 13,990 | 3,072 | 14,161 | 2,900 | 159,070 |
| VOT  | 45,313 | 12,781 | 37,611 | 9,403  | 15,828 | 3,475 | 19,008 | 3,892 | 147,315 |
| MSTd | 44,343 | 12,507 | 22,524 | 5,631  | 14,742 | 3,237 | 17,704 | 3,625 | 124,318 |
| PIT  | 44,343 | 12,507 | 22,524 | 5,631  | 14,742 | 3,237 | 17,704 | 3,625 | 124,318 |
| PO   | 44,343 | 12,507 | 22,524 | 5,631  | 14,742 | 3,237 | 17,704 | 3,625 | 124,318 |
| DP   | 43,934 | 12,392 | 18,896 | 4,724  | 14,179 | 3,113 | 17,028 | 3,487 | 117,755 |
| MIP  | 41,274 | 11,642 | 15,875 | 3,969  | 7,681  | 1,686 | 34,601 | 7,086 | 123,816 |
| MDP  | 44,343 | 12,507 | 22,524 | 5,631  | 14,742 | 3,237 | 17,704 | 3,625 | 124,318 |
| VIP  | 56,683 | 15,988 | 26,275 | 6,569  | 10,099 | 2,217 | 7,864  | 1,610 | 127,310 |
| LIP  | 51,983 | 14,662 | 20,095 | 5,024  | 11,630 | 2,554 | 28,115 | 5,757 | 139,824 |
| PITv | 45,313 | 12,781 | 37,611 | 9,403  | 15,828 | 3,475 | 19,008 | 3,892 | 147,315 |
| PITd | 45,313 | 12,781 | 37,611 | 9,403  | 15,828 | 3,475 | 19,008 | 3,892 | 147,315 |
| MSTl | 44,343 | 12,507 | 22,524 | 5,631  | 14,742 | 3,237 | 17,704 | 3,625 | 124,318 |
| CITv | 41,696 | 11,761 | 15,303 | 3,826  | 14,385 | 3,158 | 17,275 | 3,537 | 110,944 |
| CITd | 41,696 | 11,761 | 15,303 | 3,826  | 14,385 | 3,158 | 17,275 | 3,537 | 110,944 |
| FEF  | 44,053 | 12,425 | 23,143 | 5,786  | 16,943 | 3,720 | 16,128 | 3,302 | 125,504 |
| TF   | 30,774 | 8,680  | 17,143 | 4,286  | 11,082 | 2,433 | 13,310 | 2,725 | 90,436  |
| AITv | 49,224 | 13,884 | 18,066 | 4,516  | 16,982 | 3,729 | 20,395 | 4,176 | 130,977 |
| FST  | 36,337 | 10,249 | 12,503 | 3,126  | 12,624 | 2,772 | 15,160 | 3,104 | 95,879  |
| 7a   | 49,481 | 13,957 | 13,279 | 3,320  | 15,817 | 3,473 | 18,996 | 3,890 | 122,216 |
| STPp | 41,677 | 11,755 | 13,092 | 3,273  | 14,218 | 3,122 | 17,075 | 3,496 | 107,712 |
| STPa | 41,677 | 11,755 | 13,092 | 3,273  | 14,218 | 3,122 | 17,075 | 3,496 | 107,712 |
| 46   | 32,581 | 9,190  | 10,645 | 2,661  | 11,850 | 2,602 | 15,841 | 3,244 | 88,617  |
| AITd | 49,224 | 13,884 | 18,066 | 4,516  | 16,982 | 3,729 | 20,395 | 4,176 | 130,977 |
| TH   | 24,712 | 6,970  |        |        | 23,353 | 5,128 | 10,861 | 2,224 | 73,251  |

Table S9: Estimated population sizes across layers and areas underneath 1 mm<sup>2</sup> of cortical surface in each area.

## Derivation of local average connection probability

The average connection probability is obtained by integrating over all possible positions of the two neurons,

$$\bar{C}(R) = \frac{C_0}{\pi^2 R^4} \int_0^R \int_0^{2\pi} \int_0^R \int_0^{2\pi} \exp \left[ -\frac{(r_1^2 + r_2^2 - 2r_1 r_2 \cos(\theta_1 - \theta_2))}{2\sigma^2} \right] r_1 r_2 d\theta_1 dr_1 d\theta_2 dr_2, \quad (1)$$

with  $C_0$  the connection probability at zero distance and polar coordinates  $r_1, r_2, \theta_1, \theta_2$ . This can be reduced to a simpler form (Sheng, 1985),

$$\bar{C}(R) = \frac{2C_0}{\pi R^2} \int_0^{2R} e^{-r^2/2\sigma^2} \left[ 4 \arctan \left( \frac{2R-r}{2R+r} \right)^{1/2} - \sin \left( 4 \arctan \left[ \frac{2R-r}{2R+r} \right]^{1/2} \right) \right] r dr. \quad (2)$$

## Local connectivity

The indegrees of the microcircuit model (Potjans and Diesmann, 2014)  $K'_{ij}(R)$  are adapted to the area-specific laminar compositions of the multi-area model with an area-specific factor  $c_A(R)$ ,

$$K_{ij}(R) = c_A(R) K'_{ij}(R) \quad \forall i, j,$$

where  $i, j$  denote single populations in the 1 mm<sup>2</sup> patch of the cortical area. The total number of synapses local to the patch (type I) is the sum over the projections between all populations of the area:

$$N^{\text{syn,I}} = \sum_{i,j} N_i K_{ij} = c_A \sum_{i,j} N_i K'_{ij}.$$

We thus obtain  $c_A(R)$  by determining  $N^{\text{syn,I}}$ . To this end, we use retrograde tracing data from Markov et al (2011) consisting of fractions of labeled neurons ( $FLN$ ) per area as a result of injections into one area at a time. The fraction intrinsic to the injected area,  $FLN_i$ , is approximately equal for all 9 areas where this fraction was determined, with a mean of 0.79. For areas modeled with reduced size, this fraction is smaller because, in that case, synapses of both type I and II contribute to the value of 0.79 (Fig. 4E). We approximate the increasing



contribution of type I synapses with the modeled area size as the increase in indegrees averaged over population pairs,

$$\frac{N^{\text{syn,I}}(R)/N^{\text{syn,tot}}(R)}{N^{\text{syn,I}}(R_{\text{full}})/N^{\text{syn,tot}}(R_{\text{full}})} = \left\langle \frac{K_{ij}(R)}{K_{ij}(R_{\text{full}})} \right\rangle_{ij} = \left\langle \frac{K'_{ij}(R)}{K'_{ij}(R_{\text{full}})} \right\rangle_{ij},$$

where in the last step we use eq. (7). Using  $N^{\text{syn,I}}(R_{\text{full}})/N^{\text{syn,tot}}(R_{\text{full}}) = FLN_i$ , we obtain

$$N^{\text{syn,I}}(R) = N^{\text{syn,tot}}(R) FLN_i \left\langle \frac{K'_{ij}(R)}{K'_{ij}(R_{\text{full}})} \right\rangle_{ij},$$

where  $N^{\text{syn,tot}}(R) = \rho_{\text{syn}} \pi R^2 D$  with  $D$  the total thickness of the given area. The conversion factor can thus be obtained with

$$c_A(R) = \frac{N^{\text{syn,tot}}(R)}{\sum_{i,j} N_i K'_{ij}} FLN_i \left\langle \frac{K'_{ij}(R)}{K'_{ij}(R_{\text{full}})} \right\rangle_{ij}.$$

We substitute this into eq. (7) for the modeled areas where  $R = R_0$  and obtain the population-specific indegrees for type I synapses:

$$K_{ij,I} := K_{ij}(R = R_0)$$

## Processing of CoCoMac data

We use a new release of CoCoMac, in which mappings from brain regions in other nomenclatures were scrutinized to ensure a consistent transfer of connections into the FV91 name space. The CoCoMac database provides information on laminar patterns on the source side from retrograde tracing studies as well as on the target side from anterograde tracing studies. The data was extracted by using the following link, which specifies all search options: [http://cocomac.g-node.org/cocomac2/services/connectivity\\_matrix.php?dbdate=20141022&AP=AxonalProjections\\_FV91&constraint=&origins=&terminals=&square=1&merge=max&laminar=both&format=json&cite=1](http://cocomac.g-node.org/cocomac2/services/connectivity_matrix.php?dbdate=20141022&AP=AxonalProjections_FV91&constraint=&origins=&terminals=&square=1&merge=max&laminar=both&format=json&cite=1)

Furthermore, we obtained the numbers of confirmative studies for each area-level connection with the following link: [http://cocomac.g-node.org/cocomac2/services/connectivity\\_matrix.php?dbdate=20141022&AP=AxonalProjections\\_FV91&constraint=&origins=&terminals=&square=1&merge=count&laminar=off&format=json&cite=1](http://cocomac.g-node.org/cocomac2/services/connectivity_matrix.php?dbdate=20141022&AP=AxonalProjections_FV91&constraint=&origins=&terminals=&square=1&merge=count&laminar=off&format=json&cite=1)

To process these data, we applied the following steps:

- A connection is assumed to exist if there is at least one confirmative study reporting it.
- A connection from layer 2/3 is modeled if CoCoMac indicates a connection from either or both of layers 2 and 3.
- In the database, some layers carry an ‘X’ indicating a connection of unknown strength. We interpret these as ‘2’ (corresponding to medium connection strength).
- We take connection strengths in CoCoMac to represent numbers of synapses in orders of magnitude, i.e., the relative number of synapses  $N_{\text{syn}}^\nu$  in layer  $\nu$  of area  $A$  with connection strength  $\alpha(\nu)$  is computed as  $N_{\text{syn}}^\nu = 10^{\alpha(\nu)} / \sum_{\nu' \in A} 10^{\alpha(\nu')}$ .

## Mapping of synapse to cell-body locations

Detailed calculation in section Materials and Methods. The numbers are listed in Table S11. We map the 17 different cell types of Binzegger et al (2004) to the 8 cortical populations considered in our network using Table S10.

| Population in the network | Binzegger et al (2004)   |
|---------------------------|--------------------------|
| 2/3E                      | p2/3                     |
| 2/3I                      | b2/3, nb2/3              |
| 4E                        | ss4 (L4), ss4 (L2/3), p4 |
| 4I                        | b4, nb4                  |
| 5E                        | p5 (L2/3), p5 (L5/6)     |
| 5I                        | b5, nb5                  |
| 6E                        | p6 (L4), p6 (L5/6)       |
| 6I                        | b6, nb6                  |

Table S10: Mapping of Binzegger et al (2004) cell types to the 8 populations of the cortical areas in the network.

|                   |      | Synapse layer |      |      |      |      |
|-------------------|------|---------------|------|------|------|------|
|                   |      | 1             | 2/3  | 4    | 5    | 6    |
| Target population | 2/3E | 0.57          |      |      |      |      |
|                   | 2/3I |               | 0.16 |      |      |      |
|                   | 4E   | 0.18          | 0.84 | 0.73 |      |      |
|                   | 4I   |               |      | 0.16 |      |      |
|                   | 5E   | 0.25          |      | 0.02 | 0.76 |      |
|                   | 5I   |               |      |      | 0.1  |      |
|                   | 6E   | 0.003         |      | 0.09 | 0.14 | 0.85 |
| 6I                |      |               |      |      | 0.15 |      |

Table S11: Conditional probabilities  $\mathcal{P}(i|s_{cc} \in v)$  for the target neuron to belong to population  $i$  if a cortico-cortical synapse  $s_{cc}$  is located in layer  $v$ , computed with eq. (11) applied to the data set of Binzegger et al (2004). Empty cells signal zero probabilities.

## Derivation of the cortico-cortical connectivity

The number of cortico-cortical synapses from excitatory population  $j$  in area  $B$  to population  $i$  in area  $A$  is calculated as

$$N^{\text{syn,III}}(A, i, B, j) = Z_i \underbrace{\sum_{v \in P_t} Y_v \mathcal{P}(i|s_{cc} \in v)}_{\text{target side}} \underbrace{X_j}_{\text{source side}} N^{\text{syn,III}}(A, B), \quad (3)$$

$$\text{with } X_j = \begin{cases} SLN_{AB} & \text{if } j \in S \cap P_s \\ (1 - SLN_{AB}) \frac{10^{\alpha(v_j)}}{\sum_{j' \in I, \alpha(v_{j'}) > 0} 10^{\alpha(v_{j'})}} & \text{if } j \in I \text{ and } \alpha(v_j) > 0 \\ (1 - SLN_{AB}) \frac{N_{jB}}{\sum_{j' \in I} N_{j'B}} & \text{if } j \in I \cap P_s \text{ but no CoCoMac data available} \\ 0 & \text{if } j \notin P_s \end{cases},$$

$$\text{and } Y_v = \begin{cases} \frac{10^{\alpha(v_i)}}{\sum_{\alpha(v') > 0} 10^{\alpha(v')}} & \text{if } \alpha(v) > 0 \\ \frac{D_{Av_i}}{\sum_{v'} D_{Av'}} & \text{if no CoCoMac data available} \end{cases}.$$

Here,  $S = \{2/3E\}$  and  $I = \{5E, 6E\}$  respectively denote the supragranular and infragranular excitatory populations,  $v_i$  is the layer containing population  $i$ , and  $\alpha(v)$  is the layer-specific labeling density estimate from CoCoMac.  $Z_i$  is a factor which takes into account that cortico-cortical feedback connections preferentially target excitatory rather than inhibitory neurons (Johnson and Burkhalter, 1996; Anderson et al, 2011). For each feedback connection in the model, we redistribute the synapses across the excitatory and inhibitory target populations and determine  $Z_i$  such that 93% of synapses in each cortico-cortical projection are established on excitatory neurons.

## Validation of network characteristics

To validate our findings, we tested the main characteristics of the network model against alterations of three main heuristics used in its construction:

### Exponential decay of connection densities

To test the robustness of the area-level connectivity, we excluded a random subset of the *FLN* data (Markov et al, 2014a) and repeated the fit of the exponential decay of connection densities (Fig. 4C) for these reduced datasets (Figure S4A). We then used the altered fitted parameters to estimate both unknown and excluded data and proceeded with the network construction. To test if this had a significant effect on the network, we repeated the clustering analysis of Fig. 7 for 50 different trials (Figure S4B). The community structure is generally stable if 5% or 10% of the data are ignored. Ventral and dorsal stream areas are assigned to separate large clusters. Frontal areas are consistently clustered together. The two lower visual areas V1 and V2 are clustered together except in two trials, where the data on their connectivity is ignored so that it is estimated using the EDR rule, resulting in a lower connection density than suggested by the data. Areas STPp, STPa, PITd, and MSTd change clusters frequently. However, overall, the community structure proves to be robust against leaving out small portions of the underlying experimental data. If half of the experimental data is excluded, the resulting fits for the exponential decay of connection densities show clear deviations. Still, ventral and dorsal stream areas as well as frontal areas are well separated into clusters, but the cluster assignment of the remaining areas varies across trials. As an additional validation, we used the full *FLN* data to fit the exponential decay of connection densities and then introduced a random offset uniformly distributed within  $\pm\Delta$  for the logarithm of each estimated *FLN* to reflect the spread of experimental data around the fitted exponential decay of connection densities. We chose  $\Delta = 1.55$  to be the median of the absolute deviation of the logarithm of experimental data and exponential fit. This leads to a degree of variation between trials that is comparable to the case of pruning 10% of the data. Areas PITd and MSTd frequently and FST, STPa, STPp, VP, and VOT to a lesser extent change clusters.

In conclusion, the community structure of the network does not rely on single data points, but the data leave open the possibility of different cluster assignments especially of areas PITd and MSTd.

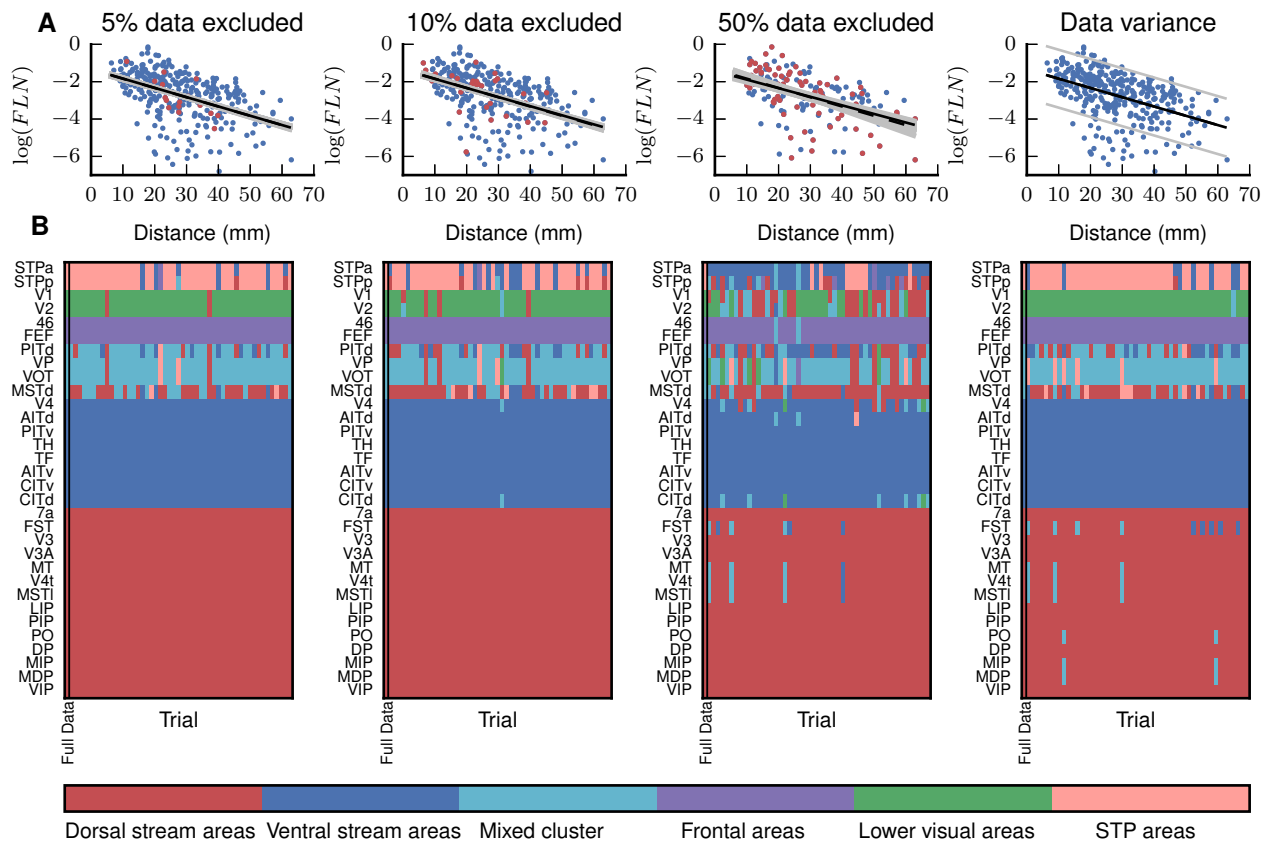

Figure S4: **Robustness of modular network structure** against using only fractions of the experimental data and increasing the variance of the estimated  $FLN$ . **a** Experimentally measured  $FLN$  from Markov et al (2014a) versus inter-areal distance. Same display as in 4C. Black line: Linear regression using a randomly drawn subset of data points (blue dots) and ignoring the remaining data points (red dots). Overlapping gray lines show linear regression lines for different trials (first three columns). The gray lines in the last column indicate the upper and lower boundary ( $\Delta(\log FLN) \in [-1.55, 1.55]$ ) of the random offset. The dashed line (overlapping with black line) shows the regression using the full dataset (as shown in Fig. 4C). **b** Visualization of community structure in the resulting network connectivity using the fitted parameters for the exponential decay of connection densities on randomly drawn subsets of the data. Clusters are determined by applying the map equation method (Rosvall et al, 2009) on the outdegrees, as in Fig. 7. The colors and cluster names are chosen as in Fig. 7. For comparison, the first column of each matrix shows the clustering of the network based on the full dataset as shown in Fig. 7

### Threshold for hierarchical categorization based on $SLN$

In Fig. 5B, we took connections with  $SLN < 0.35$  to correspond to feedback projections,  $SLN > 0.65$  to feedforward projections and  $SLN \in [0.35, 0.65]$  to lateral projections. To test whether the choice of these thresholds has a crucial influence, we tested for two different thresholds of  $[0.3, 0.7]$  and  $[0.4, 0.6]$  if the resulting laminar patterns in the connectivity and the shortest paths between areas were significantly altered. Figure S5 shows that the chosen threshold has little influence on the laminar connectivity patterns in the network. Both the target patterns and the resulting population-specific connectivity patterns show only marginal differences. The laminar distribution of shortest paths reveals small differences depending on the chosen threshold: For a broader range of  $SLN$  corresponding to lateral connections (middle column), feedforward paths solely originate in layer 2/3. For a narrower range of  $SLN$  corresponding to lateral connections (right column), more feedback connections are formed in layer 2/3. The qualitative picture remains unchanged: There are clear differences between feedforward and feedback connections, and lateral connections are more similar to feedforward connections than to feedback connections in their start-end patterns.

Figure S5: **Laminar connectivity patterns and shortest paths are robust against altering  $SLN$  threshold.** **Top panels:** Same display as in Fig. 5B. Laminar target patterns of synapse locations in relation to the fraction of supragranular labeled neurons ( $SLN$ ) of the source pattern. Target patterns are taken from the CoCoMac database (Felleman and Van Essen, 1991; Barnes and Pandya, 1992; Suzuki and Amaral, 1994; Morel and Bullier, 1990; Perkel et al, 1986; Seltzer and Pandya, 1994) and  $SLN$  data from Markov et al (2014b) mapped to the FV91 scheme. **Middle panels:** Same display as in Fig. 5D. Laminar patterns of cortico-cortical connections in the feedback, lateral, and feedforward direction, measured as the indegree of the population pairs divided by the sum of indegrees over all pairs, and then averaged across area pairs with the respective connection type ( $K_{ij} = \langle K_{iA,jB} / \sum_{i',j'} K_{i'A,j'B} \rangle_{A,B}$ ). The categorization into feedback, lateral, and feedforward types follows the  $SLN$  value as in the upper row. **Bottom panels:** Same display as in Fig. 8A. Population-specific patterns of shortest paths between directly connected pairs of areas categorized according to their hierarchical relation as defined by the  $SLN$ . Arrow thickness indicates the occurrence of the particular pattern.

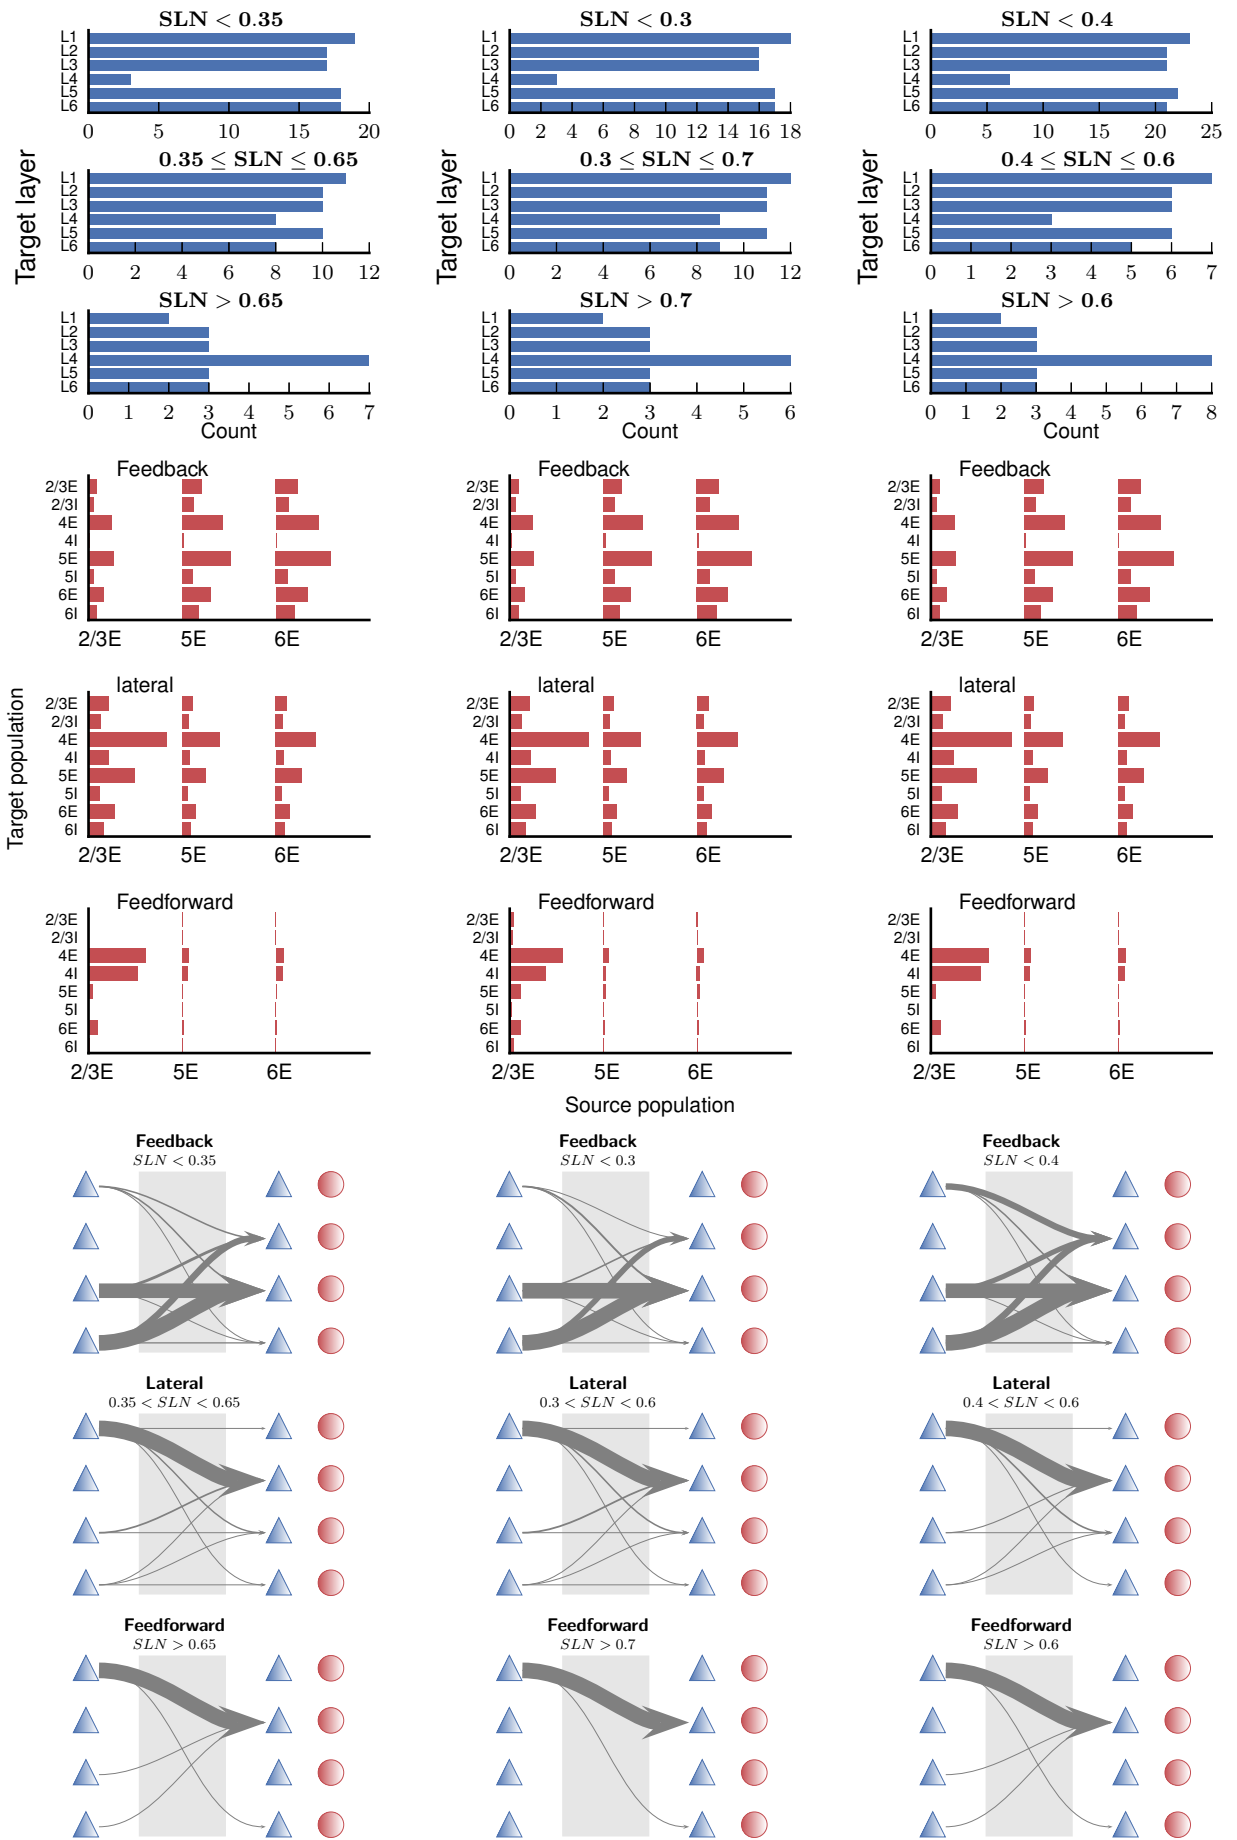

Figure S5: Laminar connectivity patterns and shortest paths are robust against altering *SLN* threshold.

### Sigmoidal relation of *SLN* with log cell density ratios

To test the robustness of our path analysis (Fig. 8) against the sigmoidal relation of *SLN* versus logarithmic cell density ratios, we used a similar procedure as for the exponential decay of connection densities: We ignored random subsets of the data (5%, 10% and 50%) from Markov et al (2014b) for the sigmoidal fit and then estimated missing data as well as the ignored data based on this modified fit. The fit of the sigmoid is only slightly influenced by excluding subsets of the data (Figure S6A). The resulting patterns of shortest paths also show little variation across trials. For 50% of data pruning, there is visible variation in the results, but the qualitative picture still holds. This shows that the heuristic of the *SLN* sigmoid delivers a robust basis for laminar connection patterns in the network model.

Figure S6: **Laminar connectivity patterns and shortest paths are robust against altering *SLN* threshold.** We randomly choose 5% (top part), 10% (middle part), and 50% (bottom part) of the *SLN* data of Markov et al (2014b) and repeat this for 50 trials. **Left part** Same display as in Fig. 5A. Fraction of source neurons in supragranular layers (*SLN*) vs. logarithmized ratio of the overall neuron densities of the two areas. *SLN* from Markov et al (2014b), neuron densities from Hilgetag et al (2016b). Black curve, fit using a beta-binomial model eq. (1) on a randomly drawn subset of data points (blue dots) and ignoring the remaining data points (red dots). Overlapping gray lines show linear regression lines for different trials and the dashed line (overlapping with black line) shows the regression using the full dataset (as shown in Fig. 5C). **Right part:** Same display as Fig. 8. **Top panels** Population-specific patterns of shortest paths between directly connected pairs of areas categorized according to their hierarchical relation as defined by the *SLN*. Arrow thickness indicates the occurrence of the particular pattern. **Middle panels** Population-specific patterns of shortest paths between all pairs of areas categorized according to the difference between their architectural types. Arrow thickness indicates the relative occurrence of the particular pattern. In top and middle panels, gray arrows show the mean value across trials and the underlying red arrows show the mean plus one standard deviation (partly not visible because of the small variation across trials). **Lower panels** Occurrence of population patterns in areas that appear in the intermediate stage in the shortest path between two areas. Error bars indicate standard deviation across trials (partly not visible because of small values)

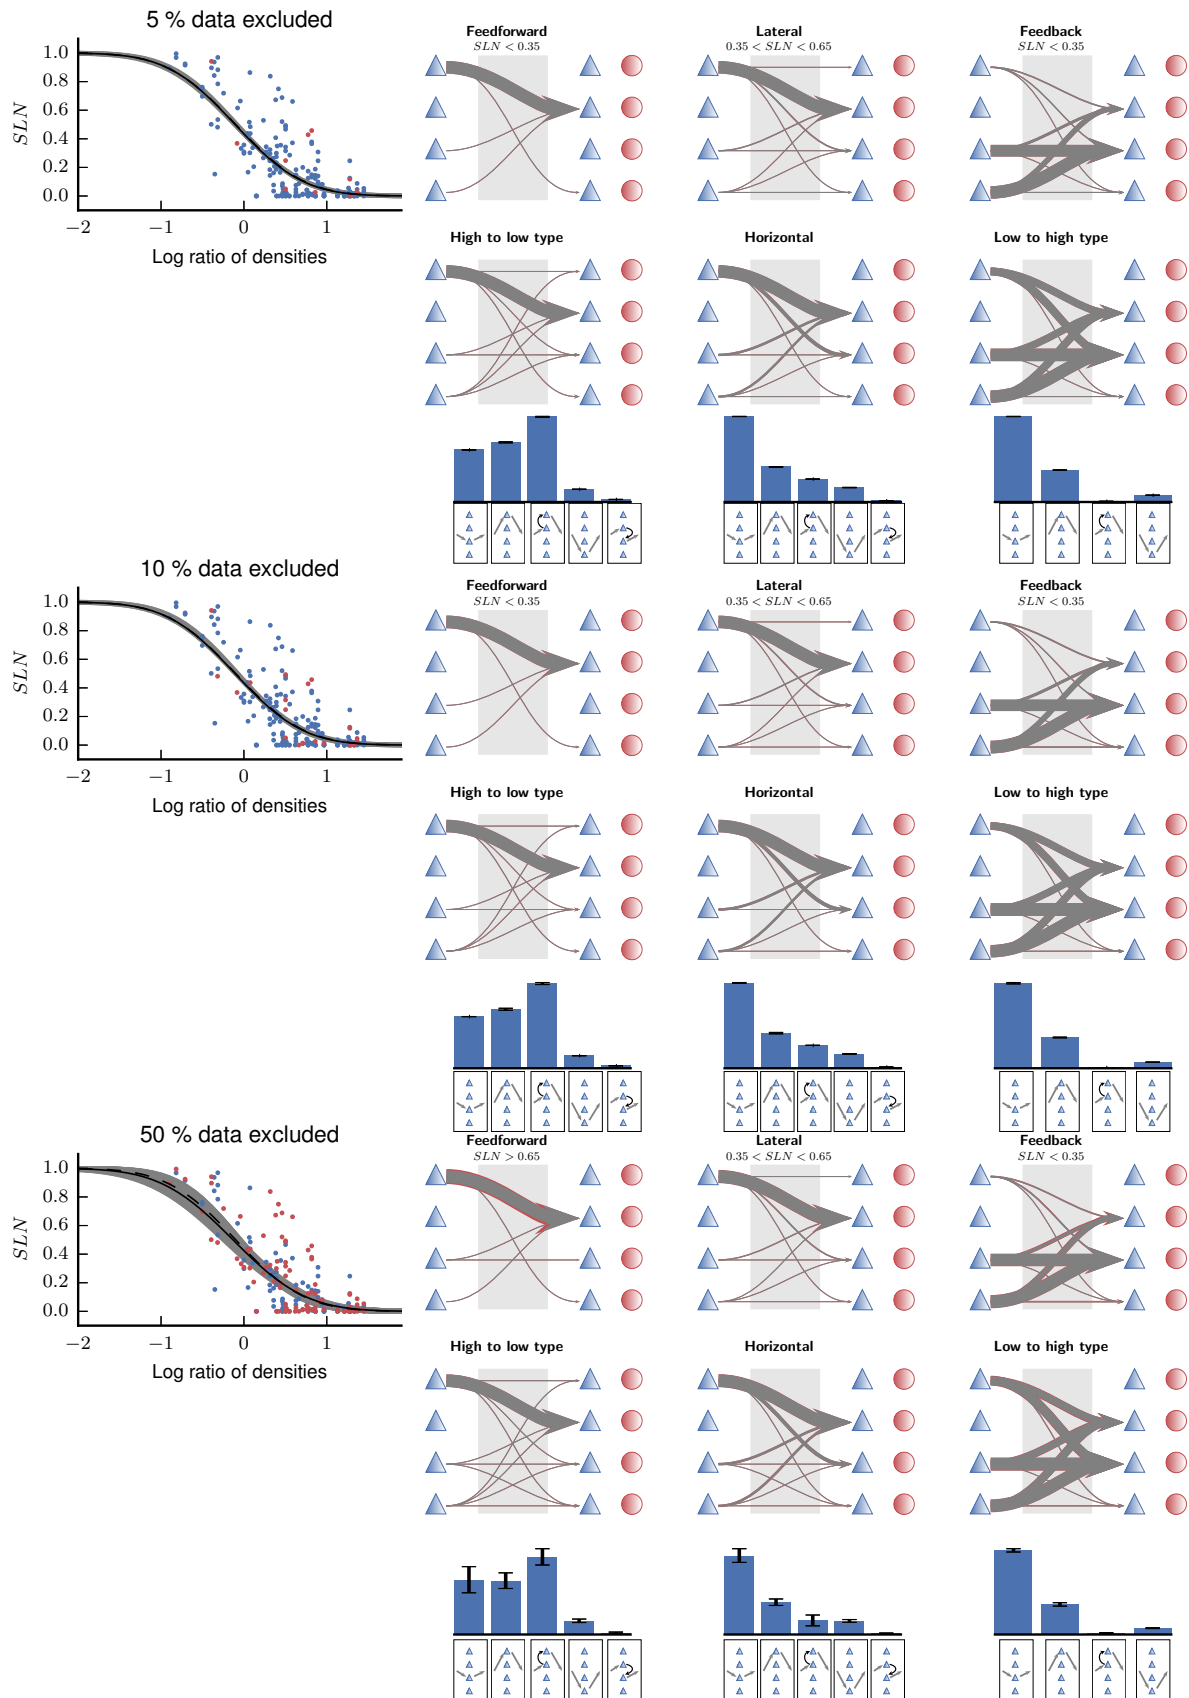

Figure S6: Laminar patterns of shortest paths are robust against using only a subset of  $SLN$  data.



### Path analysis using only connections with experimental *SLN*

To test whether the predicted laminar pattern of shortest paths depend crucially on the *SLN* predicted with the sigmoid, we repeated the path analysis shown in Fig. 8 but took only connections into account for which *SLN* data were provided by the dataset of Markov et al (2014b). This amounts to approx. 23% of the connections. Figure S7 shows that the laminar patterns of shortest paths largely match those determined from data plus estimates. The most obvious differences occur in low-to-high-type connections with a smaller proportion of paths starting in supragranular layers, and in horizontal connections with a larger proportion of paths starting in infragranular layers. Furthermore, layer 6 becomes more prominent compared to layer 5 in the origin of horizontal, feedback, and low-to-high-type paths. This does not reflect a shortcoming of the sigmoidal fit, but occurs because for this subset of connections there are relatively more source patterns stored in CoCoMac where L6 sends more connections than L5 than if all connections are taken into account. The overall characteristics, however, are still preserved, showing that the laminar patterns predicted by the model are not artificially introduced by the estimation of *SLN* through the sigmoidal relationship (Fig. 5A).

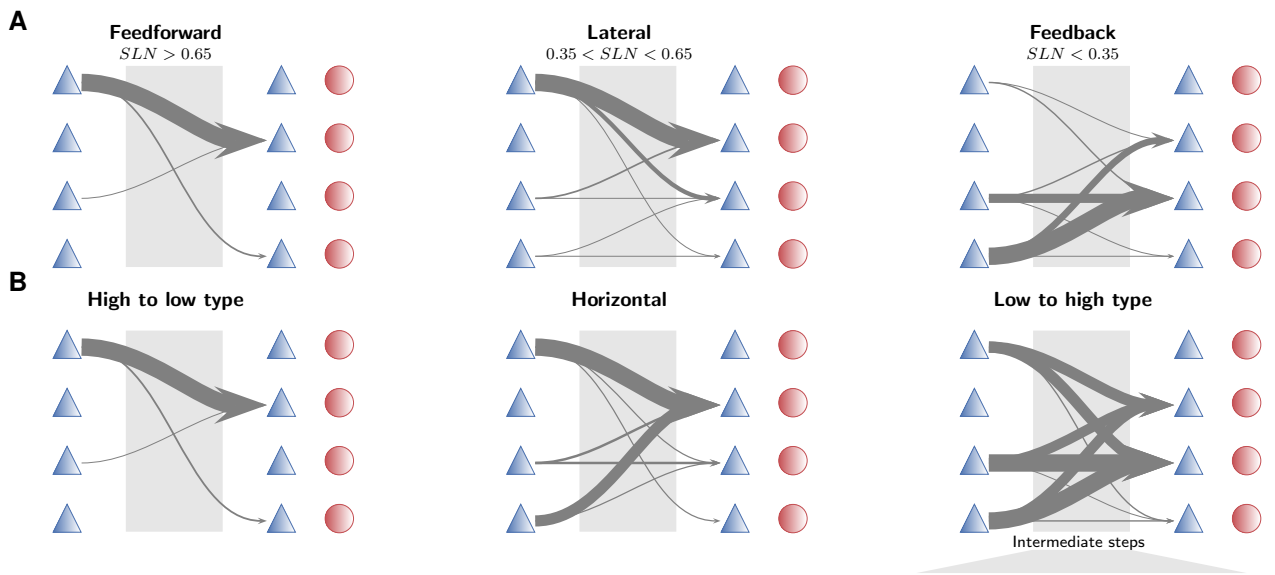

Figure S7: **Laminar patterns of shortest paths are not introduced by estimated *SLN*.** Same display as in Fig. 8 but taking only connections with available experimental data on fractions of supragranular labeled neurons (*SLN*). **a** Population-specific patterns of shortest paths between directly connected pairs of areas categorized according to their hierarchical relation as defined by the *SLN*. Arrow thickness indicates the relative occurrence of the particular pattern. **b** Population-specific patterns of shortest paths between all pairs of areas categorized according to the difference between their architectural types. Arrow thickness indicates the occurrence of the particular pattern.

## Supplemental References

- Anderson JC, Kennedy H, Martin KAC (2011) Pathways of attention: Synaptic relationships of frontal eye field to V4, lateral intraparietal cortex, and area 46 in macaque monkey. *J Neurosci* 31(30):10,872–10,881, DOI 10.1523/JNEUROSCI.0622-11.2011, URL <http://www.jneurosci.org/content/31/30/10872.abstract>, <http://www.jneurosci.org/content/31/30/10872.full.pdf+html>
- Angelucci A, Levitt JB, Lund JS (2002) Anatomical origins of the classical receptive field and modulatory surround field of single neurons in macaque visual cortical area V1. *Prog Brain Res* 136:373–388
- Barnes CL, Pandya DN (1992) Efferent cortical connections of multimodal cortex of the superior temporal sulcus in the rhesus monkey. *J Compar Neurol* 318(2):222–244
- Binzegger T, Douglas RJ, Martin KAC (2004) A quantitative map of the circuit of cat primary visual cortex. *J Neurosci* 39(24):8441–8453
- Bojak I, Oostendorp TF, Reid AT, Kötter R (2011) Towards a model-based integration of co-registered electroencephalography/functional magnetic resonance imaging data with realistic neural population meshes. *Phil Trans R Soc A* 369(1952):3785–3801
- Boussaoud D, Ungerleider L, Desimone R (1990) Pathways for motion analysis: Cortical connections of the medial superior temporal and fundus of the superior temporal visual areas in the macaque. *J Compar Neurol* 296(3):462–495
- Eggan S, Lewis D (2007) Immunocytochemical distribution of the cannabinoid CB1 receptor in the primate neocortex: A regional and laminar analysis. *Cereb Cortex* 17(1):175–191
- Felleman D, Burkhalter A, Van Essen D (1997) Cortical connections of areas V3 and VP of macaque monkey extrastriate visual cortex. *J Compar Neurol* 379(1):21–47
- Felleman DJ, Van Essen DC (1991) Distributed hierarchical processing in the primate cerebral cortex. *Cereb Cortex* 1:1–47
- Hilgetag CC, Medalla M, Beul S, Barbas H (2016a) The primate connectome in context: principles of connections of the cortical visual system. *NeuroImage* p (in press)
- Hilgetag CC, Medalla M, Beul SF, Barbas H (2016b) The primate connectome in context: Principles of connections of the cortical visual system. *NeuroImage* 134:685–702
- Johnson RR, Burkhalter A (1996) Microcircuitry of forward and feedback connections within rat visual cortex. *J Compar Neurol* 368:383–398
- Lavenex P, Suzuki W, Amaral D (2002) Perirhinal and parahippocampal cortices of the macaque monkey: Projections to the neocortex. *J Compar Neurol* 447(4):394–420
- Markov NT, Misery P, Falchier A, Lamy C, Vezoli J, Quilodran R, Gariel MA, Giroud P, Ercsey-Ravasz M, Pilaz LJ, Huissoud C, Barone P, Dehay C, Toroczka Z, Van Essen DC, Kennedy H, Knoblauch K (2011) Weight consistency specifies regularities of macaque cortical networks. *Cereb Cortex* 21(6):1254–1272
- Markov NT, Ercsey-Ravasz MM, Ribeiro Gomes AR, Lamy C, Magrou L, Vezoli J, Misery P, Falchier A, Quilodran R, Gariel MA, Sallet J, Gamanut R, Huissoud C, Clavagnier S, Giroud P, Sappey-Marinier D, Barone P, Dehay C, Toroczka Z, Knoblauch K, Van Essen DC, Kennedy H (2014a) A weighted and directed interareal connectivity matrix for macaque cerebral cortex. *Cereb Cortex* 24(1):17–36, DOI 10.1093/cercor/bhs270, URL <http://cercor.oxfordjournals.org/content/24/1/17.abstract>, <http://cercor.oxfordjournals.org/content/24/1/17.full.pdf+html>
- Markov NT, Vezoli J, Chameau P, Falchier A, Quilodran R, Huissoud C, Lamy C, Misery P, Giroud P, Ullman S, Barone P, Dehay C, Knoblauch K, Kennedy H (2014b) Anatomy of hierarchy: Feedforward and feedback pathways in macaque visual cortex. *J Compar Neurol* 522(1):225–259, DOI 10.1002/cne.23458, URL <http://dx.doi.org/10.1002/cne.23458>
- Morel A, Bullier J (1990) Anatomical segregation of two cortical visual pathways in the macaque monkey. *Visual neuroscience* 4(06):555–578
- O’Kusky J, Colonnier M (1982) A laminar analysis of the number of neurons, glia, and synapses in the visual cortex (area 17) of adult macaque monkeys. *J Compar Neurol* 210(3):278–290
- Perkel DJ, Bullier J, Kennedy H (1986) Topography of the afferent connectivity of area 17 in the macaque monkey: A double-labelling study. *J Compar Neurol* 253(3):374–402
- Petrides M, Pandya D (1999) Dorsolateral prefrontal cortex: comparative cytoarchitectonic analysis in the human and the macaque brain and corticocortical connection patterns. *Eur J Neurosci* 11(3):1011–1036
- Potjans TC, Diesmann M (2014) The cell-type specific cortical microcircuit: Relating structure and activity in a full-scale spiking network model. *Cereb Cortex* 24(3):785–806, DOI doi:10.1093/cercor/bhs358
- Preuss TM, Goldman-Rakic PS (1991) Myelo- and cytoarchitecture of the granular frontal cortex and surrounding regions in the strepsirhine primate galago and the anthropoid primate macaca. *J Compar Neurol* 310(4):429–474
- Rakic P, Suñer I, Williams R (1991) A novel cytoarchitectonic area induced experimentally within the primate visual cortex. *Proc Nat Acad Sci USA* 88(6):2083–2087
- Rockland K (1992) Configuration, in serial reconstruction, of individual axons projecting from area V2 to V4 in the macaque monkey. *Cereb Cortex* 2(5):353–374
- Rosvall M, Axelsson D, Bergstrom CT (2009) The map equation. *Eur Phys J Spec Top* 178(1):13–23
- Rozzi S, Calzavara R, Belmalih A, Borra E, Gregoriou G, Matelli M, Luppino G (2006) Cortical connections of the inferior parietal cortical convexity of the macaque monkey. *Cereb Cortex* 16(10):1389–1417

- Seltzer B, Pandya DN (1994) Parietal, temporal, and occipital projections to cortex of the superior temporal sulcus in the rhesus monkey: A retrograde tracer study. *J Compar Neurol* 343(3):445–463
- Sheng T (1985) The distance between two random points in plane regions. *Adv Appl Prob* 17(4):748–773
- Suzuki WA, Amaral DG (2003) Perirhinal and parahippocampal cortices of the macaque monkey: cytoarchitectonic and chemoarchitectonic organization. *J Compar Neurol* 463(1):67–91
- Suzuki WL, Amaral DG (1994) Perirhinal and parahippocampal cortices of the macaque monkey: cortical afferents. *J Compar Neurol* 350(4):497–533
- Van Essen DC (2002) Windows on the brain: the emerging role of atlases and databases in neuroscience. *Curr Opin Neurobiol* 12(5):574–579
- Van Essen DC (2012) Cortical cartography and caret software. *NeuroImage* 62(2):757–764
- Van Essen DC, Drury HA, Dickson J, Harwell J, Hanlon D, Anderson CH (2001) An integrated software suite for surface-based analyses of cerebral cortex. *J Am Med Inform Assoc* 8(5):443–459
